# Supplementary material for: Supramolecular polymorphism of the 1 : 1 molecular salt (adamantane-1-carboxylate-3,5,7-tricarboxylic acid)·(hexamethylenetetraminium). A “failed” crystal engineering attempt
Source: Royal Society of Chemistry journal article supplement (doi:10.1039/c1cc15849j), 2011-12-03
Supplement: c1cc15849j.pdf [file c1cc15849j.pdf]

## ELECTRONIC SUPPLEMENTARY INFORMATION

**Table S1** Comparative torsion angles of the **A** and **B** anions in forms **I** and **II**.

| <b>A</b>                | <b>I</b>  | <b>II</b> |
|-------------------------|-----------|-----------|
| O(1)-C(11)-(C2)-C(1)    | 24.2(4)   | 13.0(6)   |
| O(3)-C(12)-(C3)-C(2)    | 67.2(3)   | 82.2(5)   |
| O(5)-C(13)-(C5)-C(4)    | -29.7(4)  | -21.2(6)  |
| O(7)-C(14)-(C7)-C(6)    | -178.8(2) | -176.4(4) |
| <b>B</b>                | <b>I</b>  | <b>II</b> |
| O(9)-C(25)-(C15)-C(16)  | -9.1(4)   | -18.4(6)  |
| O(11)-C(26)-(C17)-C(16) | 179.0(3)  | 176.2(4)  |
| O(13)-C(27)-(C19)-C(20) | -168.4(3) | -176.0(4) |
| O(15)-C(28)-(C21)-C(20) | -175.5(3) | 178.6(4)  |

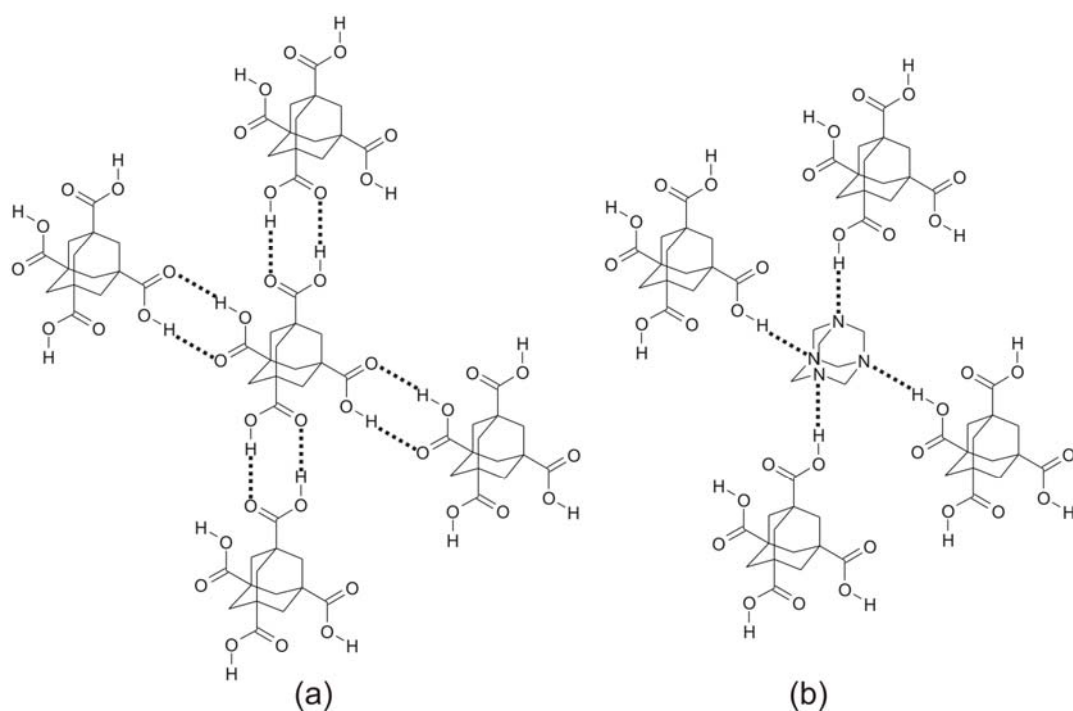

**Figure S1:** (a) The tetrahedral hydrogen bonding interactions in ATCA, which can be reproduced by replacing the central ATCA molecule with HMTA (b).

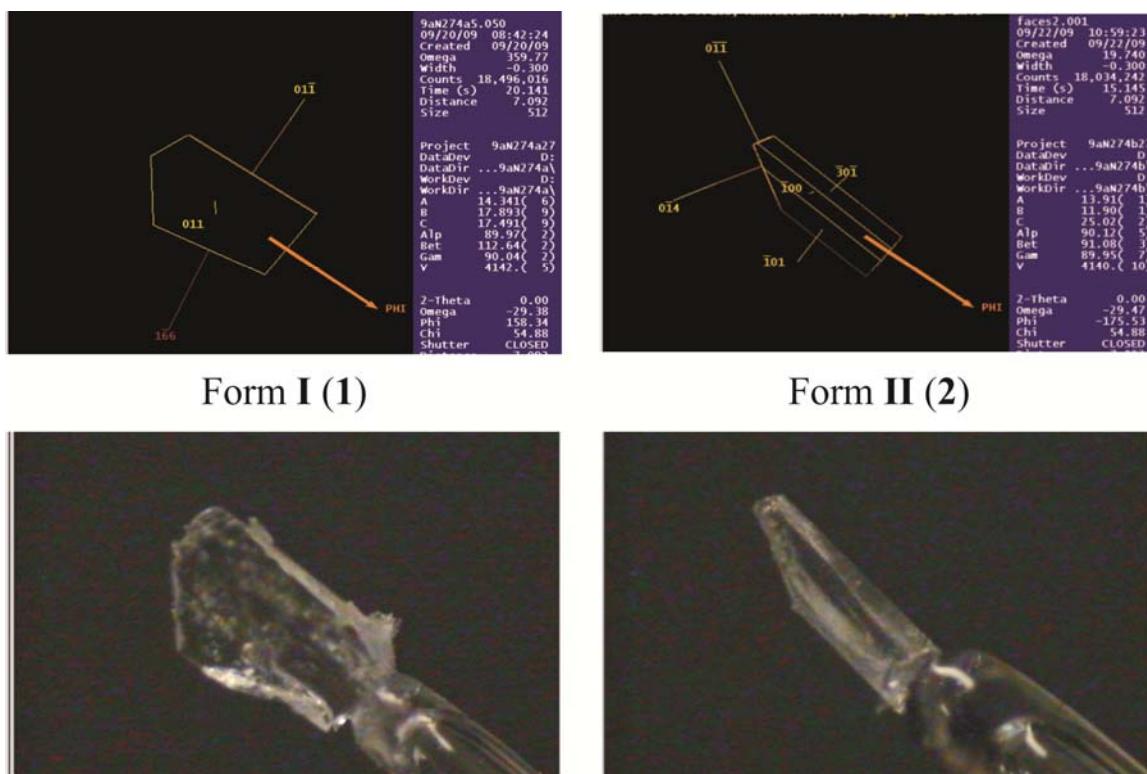

**Figure S2:** The different crystal morphologies of the two forms of the molecular salt, together with their respective unit cell dimensions and face indexes.

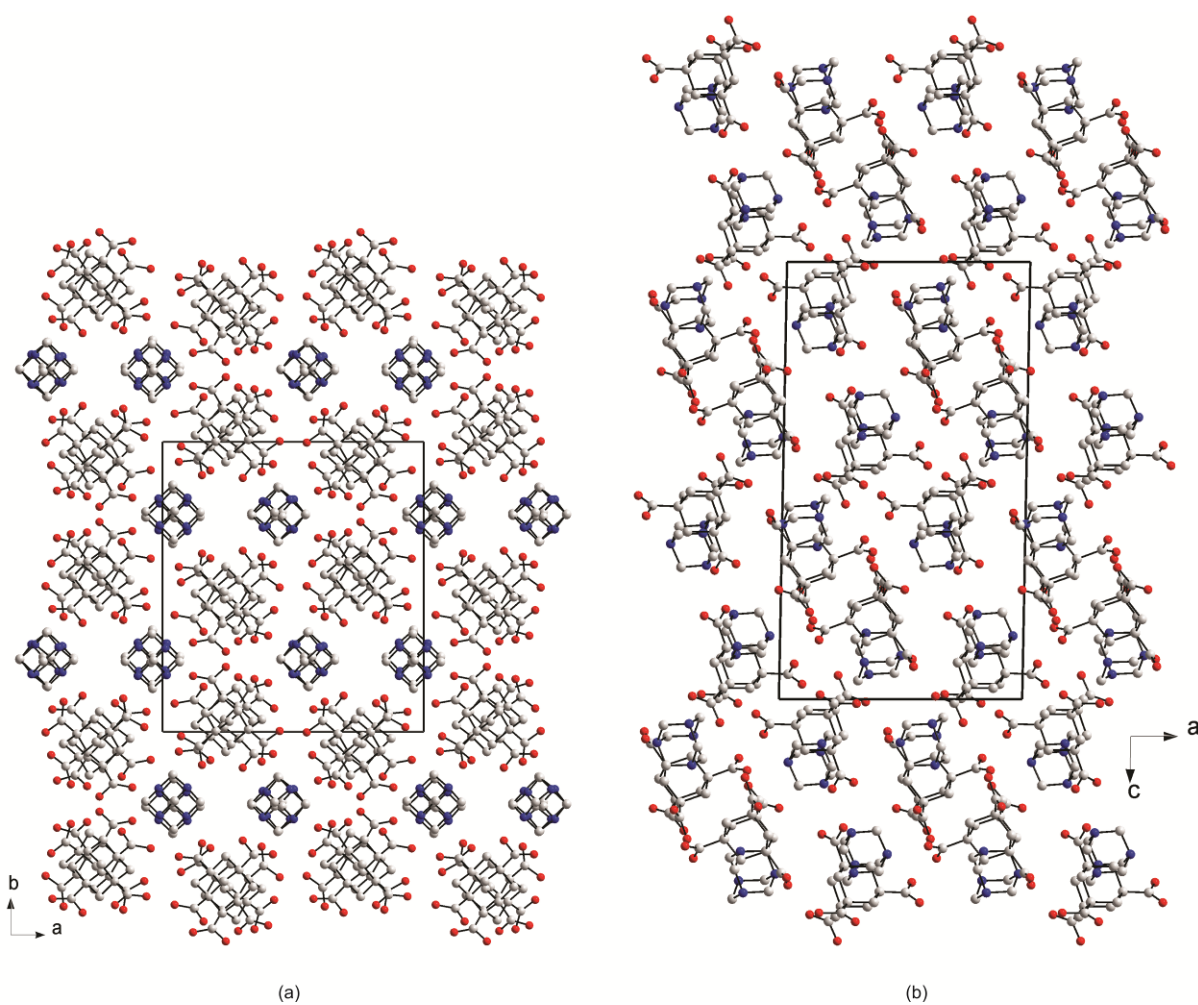

**Figure S3:** The different crystal packing architectures of form **I** (a) and form **II** (b). All H atoms are omitted for clarity.

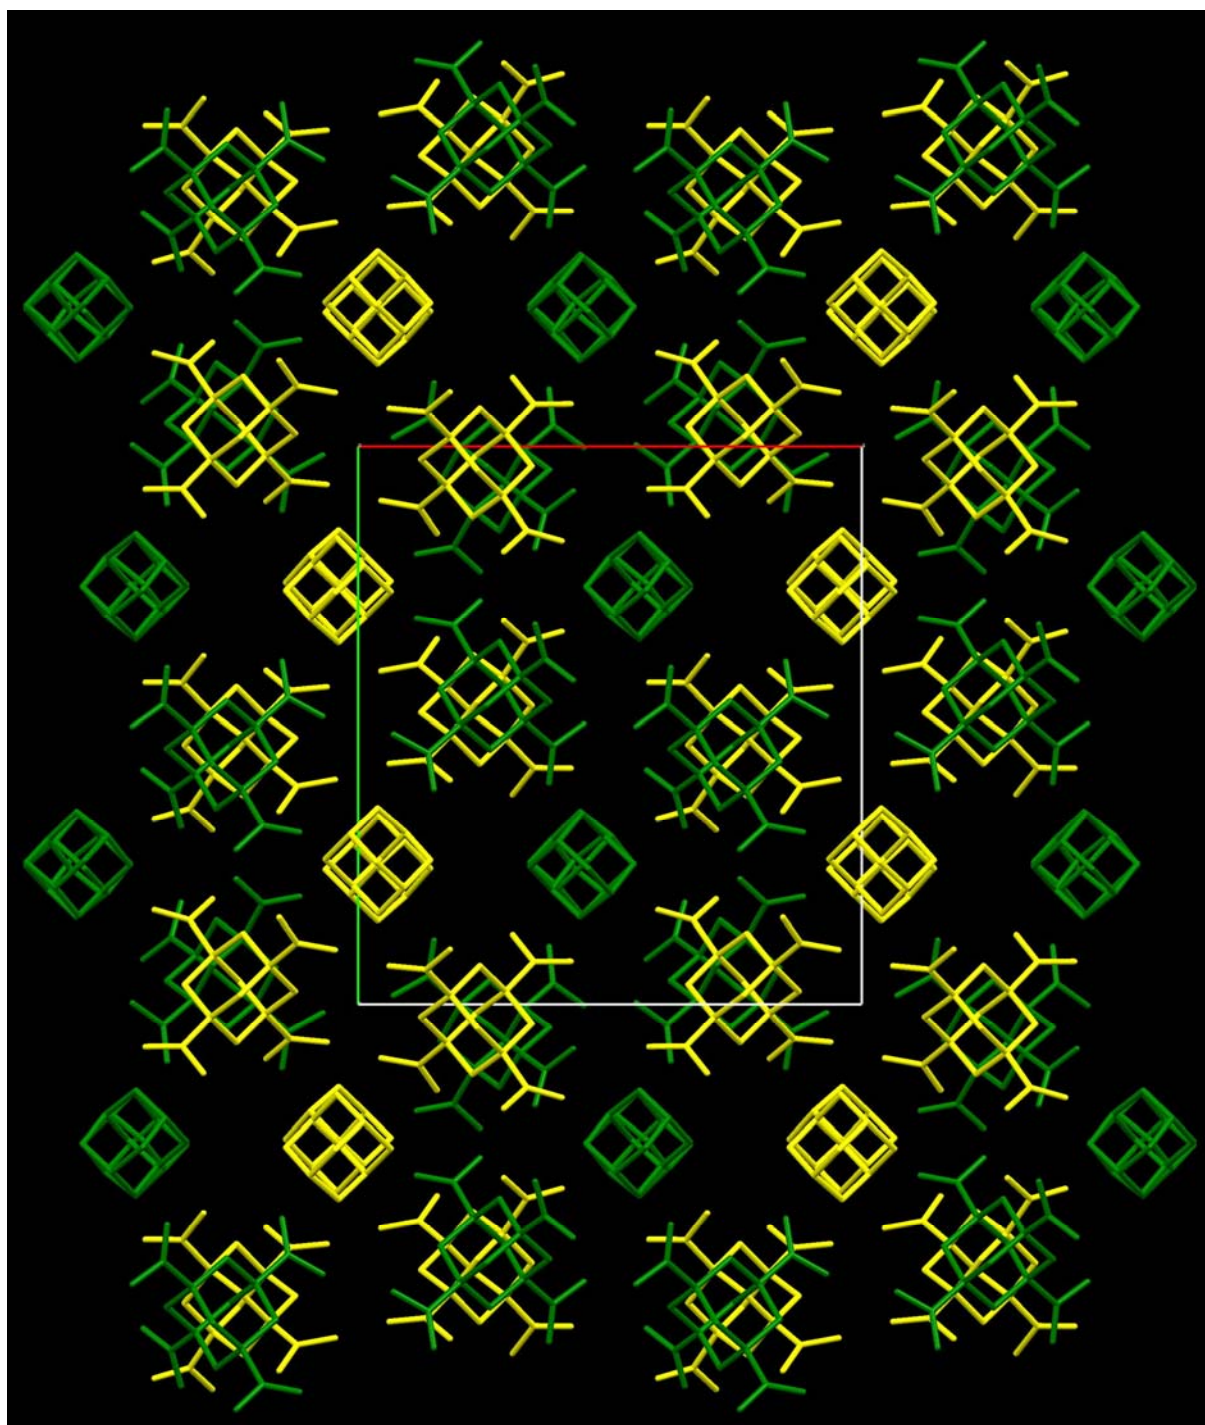

**Figure S4:** The crystal packing architectures of form **I** shown down the *c*-axis in the same viewing direction as shown in Fig. S3a. The **A** and **C** pair of anion and cation is shown in green, and the **B** and **D** pair in yellow. All H atoms are omitted for clarity.

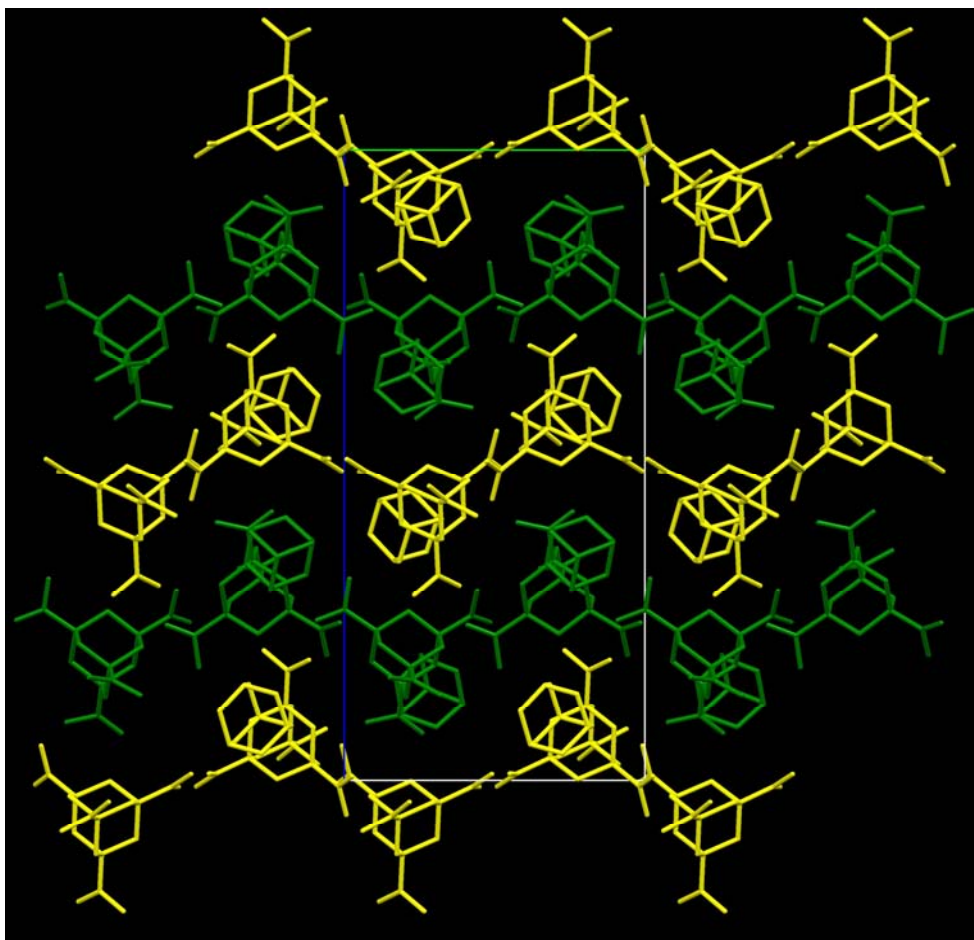

**Figure S5:** The crystal packing architectures of form **II** shown down the *a*-axis in a separate viewing direction as shown in Fig. S3b. The **A** and **C** pair of anion and cation is shown in green, and the **B** and **D** pair in yellow. All H atoms are omitted for clarity.

### Crystal Structure Solution and Refinement:

Intensity data were collected on a Bruker APEX II CCD area detector diffractometer with graphite monochromated MoK $\alpha_1$  radiation (50 kV, 30 mA) at 293 K. The collection method involved u-scans of width 0.5. Data reduction was carried out using the program *SAINT+*,<sup>1</sup> version 6.02, and empirical absorption corrections done using *SADABS*.<sup>2</sup> The crystal structure was solved by direct methods using *SHELXS-97*.<sup>3</sup> Non-hydrogen atoms were first refined isotropically followed by anisotropic refinement by full matrix least-squares calculations based on  $F^2$  using *SHELXL-97*.<sup>3</sup> Hydrogen atoms were first located in the difference map then positioned geometrically and allowed to ride on their respective parent atoms. Diagrams and publication material were generated using *WinGX*,<sup>4</sup> *ORTEP*,<sup>5</sup> *PLATON*<sup>6</sup> and *DIAMOND*.<sup>7</sup>

- 1 Bruker, *SAINT+*, Version 6.02 (Includes XPREP and SADABS), Bruker AXS Inc., Madison, Wisconsin, USA, 2004.
- 2 G. M. Sheldrick, *Sadabs*, Universität Göttingen, Germany, 2004.
- 3 G. M. Sheldrick, *Acta Crystallogr., Sect. A: Found. Crystallogr.*, 2008, 64, 112–122.
- 4 L. J. Farrugia, *WinGX*, *J. Appl. Crystallogr.*, 1999, 32, 837–838.
- 5 L. J. Farrugia, *J. Appl. Crystallogr.*, 1997, 30, 565.
- 6 A. L. Spek, *J. Appl. Crystallogr.*, 2003, 36, 7–13.
- 7 K. Brandenburg, *Diamond*, Version 2.1e, Crystal Impact GbR, Bonn, Germany, 1996–2001.

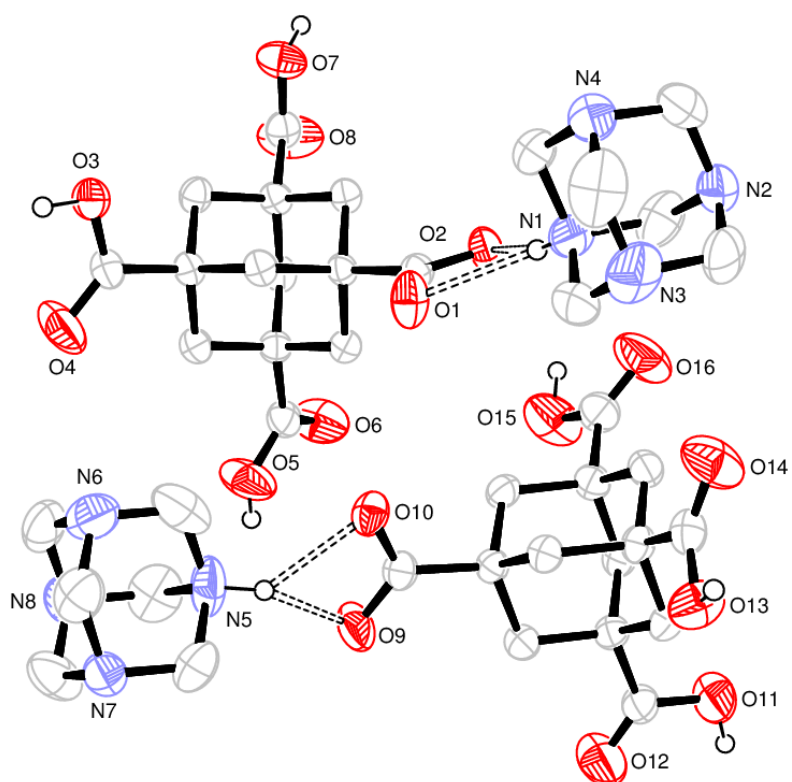

**Figure S4:** The asymmetric units of salt of **Form I**, showing the atomic numbering scheme. Displacement ellipsoids are shown at the 50% probability level. The H atoms on the C atoms are omitted for clarity.

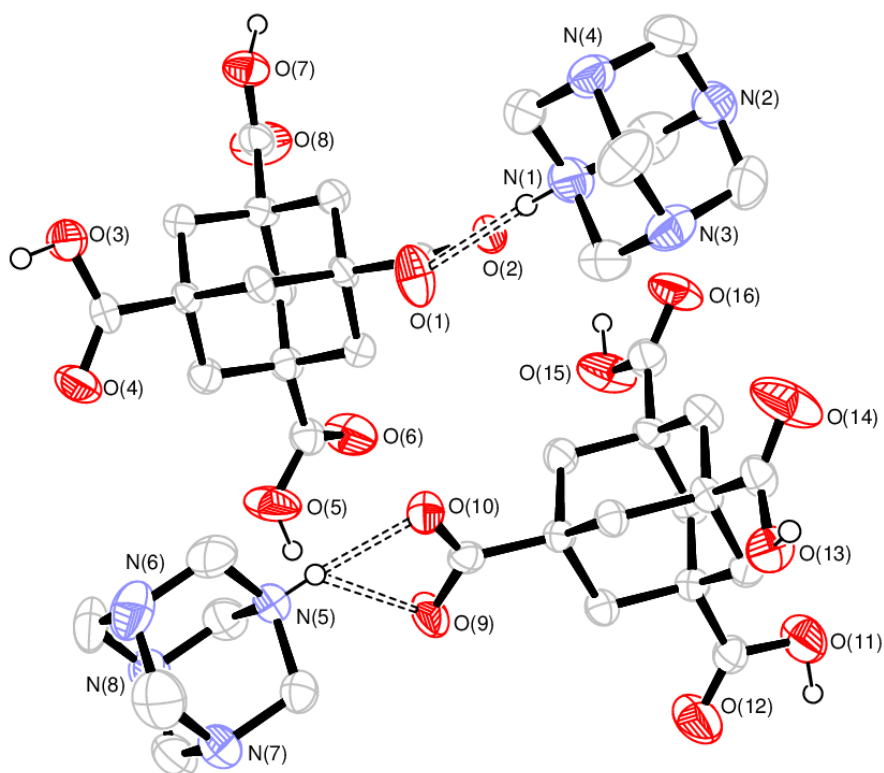

**Figure S5:** The asymmetric units of salt of **Form II**, showing the atomic numbering scheme. Displacement ellipsoids are shown at the 50% probability level. The H atoms on the C atoms are omitted for clarity.
